# Supplementary material for: The antimicrobial peptide pardaxin exerts potent anti-tumor activity against canine perianal gland adenoma
Source: PubMed Central journal article supplement (PMC4385852; doi:10.18632/oncotarget.2959), 2014-12-10
Supplement: oncotarget-06-2290-s001.pdf [file oncotarget-06-2290-s001.pdf]

## The antimicrobial peptide pardaxin exerts potent anti-tumor activity against canine perianal gland adenoma

### Supplementary Material

**Supplementary Table 1: Biochemical analysis of the blood of the indicated dogs treated with pardaxin.** Sera were collected before treatment (day 0) and on days 7, 14, 21, and 28 after primary injection. Sera were collected from dog #8 only on day 0 (pre-treatment). Biochemical parameters analyzed include packed cell volume (P.C.V), red blood cell count, hemoglobin, mean cell volume (MCV), mean cell hemoglobin (MCH), mean corpuscular hemoglobin concentration (MCHC), leukocyte number, lymphocyte number, monocyte number, thrombocyte number, plasma, fibrinogen, total protein, T-bilirubin, AST, ALT, albumin, cholesterol, triglyceride, creatinine, blood urea nitrogen (BUN), and uric acid.

| Blood analysis                         | NO.1    |         |         | NO.3    |         |         |         |         | NO.4    |         |         | NO.5    |         |         |
|----------------------------------------|---------|---------|---------|---------|---------|---------|---------|---------|---------|---------|---------|---------|---------|---------|
|                                        | 0 days  | 7 days  | 14 days | 0 days  | 7 days  | 14 days | 21 days | 28 days | 0 days  | 7 days  | 14 days | 0 days  | 7 days  | 14 days |
| P.C.V                                  | 46.3/48 | 43.8/48 | 46/45   | 43.6/39 | 37.7/38 | 25.3/25 | 38.1/35 | 42.8/40 | 47.5/48 | 47.5/43 | 35.2/36 | 40.8/40 | 40.8/37 | 39.8/40 |
| Red blood cell (1x10 <sup>6</sup> /ul) | 7.09    | 6.66    | 7.12    | 6.38    | 5.41    | 3.64    | 5.49    | 6.42    | 7.28    | 7.63    | 5.49    | 6.18    | 6.19    | 6.13    |
| Hemoglobin (g/dl)                      | 16.4    | 15.9    | 16.8    | 13.8    | 13.4    | 8.8     | 13      | 14.3    | 16.5    | 16      | 12.3    | 14.1    | 13.8    | 13.6    |
| MCV (fl)                               | 65.3    | 65.3    | 65.3    | 65.3    | 65.3    | 65.3    | 65.3    | 65.3    | 65.3    | 65.3    | 65.3    | 65.3    | 65.3    | 65.3    |
| MCH (pg)                               | 23.1    | 23.1    | 23.1    | 23.1    | 23.1    | 23.1    | 23.1    | 23.1    | 23.1    | 23.1    | 23.1    | 23.1    | 23.1    | 23.1    |
| MCHC (g/dl)                            | 35.4    | 36.3    | 36.5    | 31.7    | 35.5    | 34.8    | 34.1    | 33.4    | 34.7    | 33.9    | 34.9    | 34.6    | 33.8    | 34.2    |

|                                      |         |         |                  |         |         |         |         |       |         |       |         |       |         |                  |
|--------------------------------------|---------|---------|------------------|---------|---------|---------|---------|-------|---------|-------|---------|-------|---------|------------------|
| Total (leukocytes/ul)                | 19100   | 25900   | 16600            | 19500   | 13800   | 6200    | 15400   | 23600 | 12600   | 11500 | 13100   | 10100 | 11000   | 13300            |
| Segments (%)                         | 80      | 74      | 83               | 75      | 88      | 83      | 76      | 95    | 90      | 87    | 85      | 88    | 81      | 86               |
| Lymphocytes                          | 8       | 21      | 11               | 19      | 2       | 15      | 10      | 3     | 1       | 3     | 3       | 7     | 10      | 7                |
| Monocytes                            | 7       | 3       | 4                | 4       | 10      |         | 9       | 1     | 8       | 10    | 11      | 4     | 7       | 5                |
| Thrombocytes (1x10 <sup>3</sup> /ul) | 285     | 290     | 339              | 72      | 239     | 53      | 223     | 219   | 113     | 151   | 109     | 457   | 434     | 453              |
| Plasma                               | Clear   | Clear   | slight hemolysis | clear   | clear   | clear   | clear   | clear | clear   | clear | clear   | clear | clear   | slight hemolysis |
| Fibrinogen (g/dl)                    | 0.6     | 0.4     | 0.4              | 0       | 0.2     | 0.2     | 0.2     | 0.6   | 0.6     | 0     | 0.6     | 0.2   | 0.8     | ND               |
| Total protein (g/dl)                 | 6.6/6.0 | 6.4/6.0 | 7/6.6            | 8.6/8.6 | 8.4/8.2 | 8.2/8.2 | 8.6/8.4 | 9/8.4 | 7.4/6.8 | 6.4/6 | 5.8/5.2 | 9.2/9 | 9.6/8.8 | 9/8.8            |
| T.Bilirubin (mg/dl)                  | 0.4     | 0.3     | 0.5              | 0.4     | 0.3     | 0.4     | 0.6     | 0.4   | 0.5     | 0.6   | 0.6     | 0.5   | 0.9     | 0.7              |
| AST (U/L)                            | 30      | 29      | 36               | 61      | 43      | 27      | 34      | 42    | 41      | 47    | 47      | 42    | 47      | 51               |
| ALT (U/L)                            | 38      | 39      | 45               | 40      | 34      | 31      | 24      | 22    | 98      | 95    | 83      | 51    | 39      | 32               |
| Albumin (g/dl)                       | 2.9     | 2.8     | 3.1              | 3.5     | 3.3     | 3.1     | 3.2     | 2.8   | 3.2     | 2.7   | 2.5     | 3.1   | ND      | ND               |
| Cholesterol (mg/dl)                  | 165     | 197     | 193              | 245     | 235     | 234     | 253     | 210   | 187     | 167   | 147     | 313   | 336     | 289              |
| Triglyceride (mg/dl)                 | 63      | 66      | 78               | 47      | 48      | 58      | 49      | 48    | 52      | 117   | 99      | 73    | 119     | 132              |
| Creatinine (mg/dl)                   | 0.6     | 0.4     | 0.7              | 0.4     | 0.4     | 0.4     | 0.4     | 0.4   | 0.4     | 0.4   | 0.3     | 0.3   | 0.4     | 0.3              |
| BUN (mg/dl)                          | 17.6    | 12.8    | 18.4             | 9.9     | 7.7     | 7.8     | 10.7    | 6.5   | 7.1     | 6.6   | 6.5     | ND    | 15.7    | 7.6              |
| Uric acid (mg/dl)                    | 0.4     | 0.4     | 0.4              | 0.5     | 0.6     | 0.6     | 0.7     | 0.7   | 0.6     | 0.7   | 0.6     | 0.7   | 0.6     | 0.7              |

| Blood analysis                            | NO.6    |         |           |           |         | NO.7    |         |         |         |         | NO.8    |         | NO.9    |         |         |         |
|-------------------------------------------|---------|---------|-----------|-----------|---------|---------|---------|---------|---------|---------|---------|---------|---------|---------|---------|---------|
|                                           | 0 day   | 7 day   | 14 day    | 21 day    | 28 day  | 0 day   | 7 day   | 14 day  | 21 day  | 28 day  | 0 day   | 0 day   | 7 day   | 14 day  | 21 day  | 28 day  |
| P.C.V                                     | 39.2/32 | 35.6/35 | 37.3/34   | 35.3/27   | 34.6/36 | 50.9/52 | 43.7/44 | 44.6/48 | 36/38   | 41.5/44 | 39.9/38 | 37/42   | 38.3/39 | 37.3/36 | 35.4/37 | 32.7/34 |
| red blood cell<br>(1x10 <sup>6</sup> /ul) | 6.48    | 5.76    | 5.88      | 5.84      | 5.63    | 7.73    | 6.62    | 6.73    | 5.48    | 6.29    | 6.83    | 6.51    | 6.28    | 6.12    | 5.56    | 5.48    |
| hemoglobin (g/dl)                         | 13.2    | 12.6    | 12.5      | 13        | 12.1    | 17.6    | 15.2    | 15.5    | 12.3    | 14      | 14.8    | 14.4    | 13      | 12.7    | 12.5    | 11.7    |
| MCV (fl)                                  | 65.3    | 65.3    | 65.3      | 65.3      | 65.3    | 65.3    | 66      | 64.4    | 65.7    | 66      | 65.3    | 56.8    | 61      | 60.8    | 60.4    | 59.7    |
| MCH (pg)                                  | 23.1    | 23.1    | 23.1      | 23.1      | 23.1    | 23.1    | 23      | 22.4    | 22.4    | 22.3    | 23.1    | 22.1    | 20.7    | 20.8    | 21.3    | 21.4    |
| MCHC (g/dl)                               | 33.7    | 35.4    | 33.5      | 36.8      | 35      | 34.6    | 34.8    | 34.8    | 34.2    | 33.7    | 37.1    | 38.9    | 33.9    | 34.1    | 35.3    | 35.8    |
| total (leukocytes/ul)                     | 11400   | 9700    | 8800      | 8200      | 8100    | 31100   | 21100   | 24400   | 41200   | 34300   | 35500   | 11600   | 20200   | 17900   | 10700   | 10100   |
| segments (%)                              | 79      | 84      | 70        | 67        | 83      | 86      | 76      | 76      | 84      | 80      | 88      | 92      | 88      | 92      | 60      | 78      |
| Lymphocytes                               | 3       | 7       | 9         | 16        | 5       | 4       | 6       | 8       | 6       | 8       | 1       | 5       | 7       | 3       | 18      | 16      |
| Monocytes                                 | 7       | 7       | 11        | 5         | 4       | 8       | 17      | 16      | 9       | 7       | 1       | 3       | 5       | 5       | 18      | 5       |
| thrombocytes<br>(1x10 <sup>3</sup> /ul)   | 133     | 72      | 62        | 117       | 145     | 223     | 292     | 282     | 185     | 352     | 94      | 87      | 198     | 305     | 379     | 187     |
| Plasma                                    | clear   | clear   | clear     | clear     | clear   | clear   | clear   | clear   | clear   | clear   | clear   | clear   | clear   | clear   | clear   | clear   |
| fibrinogen (g/dl)                         | 0       | 0.8     | 0.6       | 0.2       | 0.2     | 0.8     | 0.9     | 0       | 0.6     | 0.2     | 0.8     | 0.2     | ND      | 0.2     | 0.2     | ND      |
| total protein (g/dl)                      | 9.8/9.8 | 9.6/8.8 | 11.2/10.6 | 10.6/10.4 | 8.4/8.2 | 8.8/8   | 9.0/8.1 | 8.0/8.0 | 8.2/7.6 | 8.2/8.0 | 7.7/6.6 | 6.4/6.2 | 5.6/5.2 | 6.2/6.0 | 7.0/6.8 | 6.4/6.4 |
| T.Bilirubin (mg/dl)                       | 0.3     | 0.3     | 0.2       | 0.2       | 0.2     | 0.5     | 0.4     | 0.5     | 0.5     | 0.5     | 0.5     | 0.5     | 1.3     | 0.3     | 0.5     | 0.5     |
| AST (U/L)                                 | 47      | 35      | 1.7       | 30        | 42      | 33      | 22      | 28      | 24      | 37      | 81      | 65      | 23      | 25      | 32      | 23      |
| ALT (U/L)                                 | 60      | 52      | 60        | 73        | 51      | 30      | 27      | 17      | 15      | 11      | 23      | 31      | 29      | 29      | 26      | 28      |

|                          |     |      |     |     |      |      |      |     |     |     |      |      |      |      |      |      |
|--------------------------|-----|------|-----|-----|------|------|------|-----|-----|-----|------|------|------|------|------|------|
| Albumin (g/dl)           | 3.1 | 3.1  | ND  | ND  | ND   | 3.1  | 3.4  | 3.3 | 2.4 | 2.6 | 3.1  | 3    | 2.7  | 2.8  | 2.7  | 26   |
| Cholesterol (mg/dl)      | 222 | 266  | 334 | 220 | 235  | 182  | 237  | 290 | 176 | 279 | 204  | 159  | 107  | 143  | 127  | 180  |
| Triglyceriide<br>(mg/dl) | 28  | 130  | 30  | 44  | 45   | 49   | 90   | 71  | 101 | 114 | 54   | 66   | 114  | 92   | 89   | 83   |
| Creatinine (mg/dl)       | 0.3 | 0.2  | 0.3 | 0.3 | 0.4  | 0.6  | 0.3  | 0.4 | 0.1 | 0.4 | 0.3  | 0.9  | 1.2  | 1.4  | 1.1  | 1    |
| BUN (mg/dl)              | 9.3 | 13.7 | 10  | 9   | 11.9 | 13.5 | 10.8 | 7.2 | 8.8 | 7.9 | 11.8 | 23.7 | 29.6 | 25.2 | 29.4 | 25.4 |
| Uric acid (mg/dl)        | 0.6 | 0.9  | 0.6 | 0.6 | 0.5  | 0.7  | 0.5  | 0.7 | 0.5 | 0.7 | 0.5  | 0.7  | 0.5  | 0.5  | 0.6  | 0.5  |

| Blood analysis                         | NO.10   |         |         |         |         | NO.11   |         |         |         |         | NO.12   |         |         |         |         |
|----------------------------------------|---------|---------|---------|---------|---------|---------|---------|---------|---------|---------|---------|---------|---------|---------|---------|
|                                        | 0 day   | 7 day   | 14 day  | 21 day  | 28 day  | 0 day   | 7 day   | 14 day  | 21 day  | 28 day  | 0 day   | 7 day   | 14 day  | 21 day  | 28 day  |
| P.C.V                                  | 38.2/38 | 37.9/35 | 26.2/25 | 38.8/40 | 32.9/29 | 38.3/41 | 45.3/38 | 43.4/43 | 43.4/39 | 44.2/41 | 36.9/35 | 39.8/36 | 44/45   | 37.6/39 | 41.2/40 |
| red blood cell (1x10 <sup>6</sup> /ul) | 5.79    | 5.64    | 3.93    | 5.72    | 4.83    | 6.27    | 7.49    | 7.06    | 7.25    | 7.47    | 5.5     | 6.12    | 6.7     | 5.65    | 6.19    |
| hemoglobin (g/dl)                      | 13.5    | 13      | 9       | 13.1    | 10.4    | 13.6    | 14.2    | 14.6    | 14.2    | 14.2    | 12.8    | 13.7    | 15.2    | 13.1    | 14.4    |
| MCV (fl)                               | 66      | 67.2    | 66.7    | 67.8    | 68.1    | 61.1    | 60.5    | 60.1    | 59.9    | 57.22   | 67.1    | 65      | 65.7    | 66.5    | 66.6    |
| MCH (pg)                               | 23.3    | 23      | 22.9    | 22.9    | 21.5    | 21.7    | 19      | 20.7    | 19.6    | 19      | 23.3    | 22.4    | 22.7    | 23.2    | 23.3    |
| MCHC (g/dl)                            | 35.3    | 34.3    | 34.4    | 33.8    | 31.6    | 35.5    | 31.3    | 34.4    | 32.7    | 32.1    | 34.7    | 34.4    | 34.5    | 34.8    | 35      |
| total (leukocytes/ul)                  | 8900    | 10200   | 7750    | 7700    | 7300    | 9800    | 8000    | 10600   | 6000    | 8600    | 10300   | 10300   | 14700   | 20000   | 14000   |
| segments (%)                           | 81      | 68      | 52      | 75      | 50      | 56      | 73      | 78      | 53      | 68      | 67      | 68      | 72      | 82      | 56      |
| Lymphocytes                            | 15      | 19      | 36      | 10      | 30      | 24      | 24      | 14      | 24      | 20      | 27      | 19      | 18      | 10      | 30      |
| Monocytes                              | 4       | 7       | 3       | 5       | 5       | 15      | 1       | 7       | 19      | 9       | 2       | 11      | 7       | 6       | 10      |
| thrombocytes (1x10 <sup>3</sup> /ul)   | 117     | 128     | 132     | 187     | 140     | 254     | 255     | 238     | 348     | 308     | 60      | 156     | 150     | 126     | 201     |
| Plasma                                 | clear   | clear   | clear   | clear   | clear   | clear   | clear   | clear   | clear   | clear   | clear   | clear   | clear   | clear   | clear   |
| fibrinogen (g/dl)                      | 0.2     | 1       | 0       | 0.4     | 0.4     | 0.2     | 0.2     | 0       | 0.2     | 0.4     | 0.2     | 0.2     | ND      | 0.2     | 0.1     |
| total protein (g/dl)                   | 7.0/6.8 | 8.0/7.0 | 7.0/7.0 | 8.4/8.0 | 7/6.6   | 6.8/6.6 | 6.4/6.2 | 7.4/7.4 | 7.4/7.2 | 7.0/6.6 | 7.8/7.6 | 7.4/7.2 | 7.8/7.8 | 7.0/6.8 | 7.6/7.2 |
| T.Bilirubin (mg/dl)                    | 0.4     | 0.8     | 0.8     | 0.1     | 0.2     | 0.2     | 0.3     | 0.2     | 0.2     | 0.2     | 0.3     | 0.2     | 0.1     | 0.2     | 0.2     |
| AST (U/L)                              | 41      | 14      | 29      | 29      | 25      | 23      | 43      | 24      | 21      | 23      | 30      | 75      | 102     | 24      | 20      |
| ALT (U/L)                              | 68      | 75      | 87      | 134     | 78      | 24      | 24      | 26      | 22      | 27      | 115     | 65      | 401     | 88      | 57      |
| Albumin (g/dl)                         | 3       | 2.6     | 1.5     | 3       | 14.3    | 3.1     | 3       | 3       | 3       | 2.7     | 2.7     | ND      | ND      | ND      | ND      |

|                       |     |      |      |      |      |      |      |      |     |      |      |      |      |      |      |
|-----------------------|-----|------|------|------|------|------|------|------|-----|------|------|------|------|------|------|
| Cholesterol (mg/dl)   | 108 | 118  | 124  | 115  | ND   | 181  | 227  | 226  | 225 | 188  | 354  | 220  | 230  | 211  | 191  |
| Triglyceriide (mg/dl) | 36  | 93   | 75   | 77   | ND   | 74   | 97   | 107  | 72  | 60   | 56   | 41   | 115  | 59   | 48   |
| Creatinine (mg/dl)    | 0.7 | 0.8  | 0.9  | 0.7  | 0.9  | 1    | 1    | 1.2  | 0.8 | 1    | 0.5  | 0.5  | 0.5  | 0.6  | 0.5  |
| BUN (mg/dl)           | 13  | 18.5 | 16.5 | 16.6 | 14.3 | 22.1 | 19.8 | 24.5 | 22  | 16.5 | 18.7 | 14.7 | 14.3 | 13.7 | 16.9 |
| Uric acid (mg/dl)     | 0.4 | 0.4  | 0.5  | 0.4  | ND   | 0.4  | 0.6  | 0.4  | 0.4 | 0.4  | 0.6  | 0.3  | 0.5  | 0.4  | 0.4  |

|                             | NO.13 |       |        |        |        | NO.14 |       |        |        |        |
|-----------------------------|-------|-------|--------|--------|--------|-------|-------|--------|--------|--------|
|                             | 0 day | 7 day | 14 day | 21 day | 28 day | 0 day | 7 day | 14 day | 21 day | 28 day |
| GLU (mg/dl)                 | 106   | 87    | 100    | 90     | 99     | 114   | 118   | 119    | 99     | 101    |
| BUN (mg/dl)                 | 12    | 21    | 20     | 23     | 30     | 9     | 9     | 5      | 12     | 12     |
| CREA (mg/dl)                | 1.1   | 1     | 0.9    | 1.1    | 1      | 1.2   | 1.3   | 1.1    | 1.2    | 1.3    |
| PHOS (mg/dl)                | 3.5   | 6     | 5.6    | 5.5    | 5.5    | 4.2   | 4.6   | 4.0    | 4.9    | 4.6    |
| CA (mg/dl)                  | 10.6  | 10.6  | 10.9   | ND     | 10.6   | 10.3  | 10.3  | 10.4   | 10.1   | 9.9    |
| TP (g/dl)                   | 7.2   | 7.4   | 7.8    | 8.1    | 7.5    | 6.9   | 7.4   | 7.7    | 7.3    | 7.2    |
| ALB (g/dl)                  | 3     | 2.9   | 3.1    | 3      | 3      | 3.3   | 3.1   | 3.3    | 3.3    | 3.3    |
| GLOB (g/dl)                 | 4.2   | 4.5   | 4.7    | 5.1    | 4.5    | 3.6   | 4.3   | 4.4    | 4.0    | 3.9    |
| ALT (U/L)                   | 85    | 56    | 87     | 26     | 24     | 34    | 51    | 52     | 30     | 32     |
| ALKP (U/L)                  | 135   | 101   | 106    | 95     | 73     | 183   | 140   | 229    | 182    | 151    |
| TBIL (mg/dl)                | 0.4   | 0.4   | 0.4    | 0.3    | 0.3    | 0.3   | 0.2   | 0.3    | 0.3    | 0.3    |
| CHOL (mg/dl)                | 183   | 204   | 210    | 222    | 221    | 178   | 185   | 204    | 169    | 171    |
| AMYL (U/L)                  | 1040  | 1332  | 882    | 899    | 829    | 779   | 835   | 470    | 732    | 727    |
| WBC (1x10 <sup>9</sup> /l)  | 14.6  |       | 14     | 9.9    | 11.6   | 12.1  | ND    | 14.4   | 13.3   | 10.6   |
| LYM (1x10 <sup>9</sup> /l)  | 3.8   |       | 2      | 1.3    | 3.3    | ND    | ND    | ND     | ND     | ND     |
| MID (1x10 <sup>9</sup> /l)  | 2.5   |       | 1.4    | 1      | 1.9    | ND    | ND    | ND     | ND     | ND     |
| GRAN (1x10 <sup>9</sup> /l) | 8.3   |       | 10.6   | 7.6    | 6.4    | ND    | ND    | ND     | ND     | ND     |
| LYM (%)                     | 25.9  |       | 14.2   | 13.7   | 28.3   | ND    | ND    | ND     | ND     | ND     |
| MID (%)                     | 16.9  |       | 10     | 9.4    | 16.2   | ND    | ND    | ND     | ND     | ND     |
| GRA (%)                     | 57.2  |       | 75.8   | 76.9   | 55.5   | ND    | ND    | ND     | ND     | ND     |

|                             |      |      |      |      |      |      |      |      |      |
|-----------------------------|------|------|------|------|------|------|------|------|------|
| HGB (g/dl)                  | 15   | 15   | 19.5 | 14.2 | 16.3 | 69.6 | 16.5 | 14.6 | 15.1 |
| HCT (%)                     | 40.1 | 40   | 53.3 | 38.5 | 47.6 | 46.4 | 48.2 | 44.0 | 45.6 |
| RBC (1x10 <sup>12</sup> /l) | 6.63 | 6.59 | 8.75 | 6.2  | 7.68 | 7.68 | 7.94 | 7.33 | 7.25 |
| MCV (fl)                    | 60.4 | 60.6 | 60.8 | 62   | 62.0 | 60.4 | 60.7 | 60.0 | 60.6 |
| MCH (pg)                    | 22.7 | 22.7 | 22.3 | 23   | 21.0 | 90.6 | 20.8 | 19.9 | 20.1 |
| MCHC (g/dl)                 | 37.6 | 37.5 | 36.6 | 37.1 | 34.3 | ND   | 34.2 | 33.2 | 33.1 |
| RDW (%)                     | 20.3 | 20.4 | 21.1 | 20.3 | ND   | ND   | ND   | ND   | ND   |
| RDWa (fl)                   | 43.3 | 43.3 | 45.8 | 44   | ND   | ND   | ND   | ND   | ND   |
| PLT (1x10 <sup>9</sup> /l)  | 318  | 317  | 276  | 347  | 306  | 315  | 177  | 278  | 288  |
| MPV (fl)                    | 6.5  | 6.5  | 6.6  | 6.3  | 9.5  | 8.8  | 9.3  | 9.4  | 9.4  |



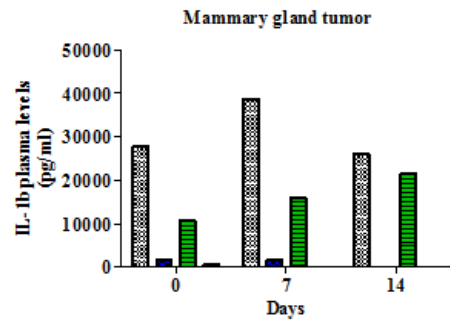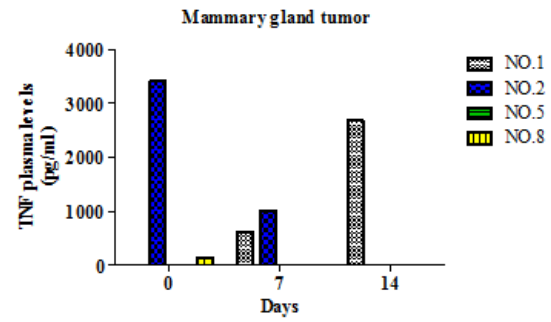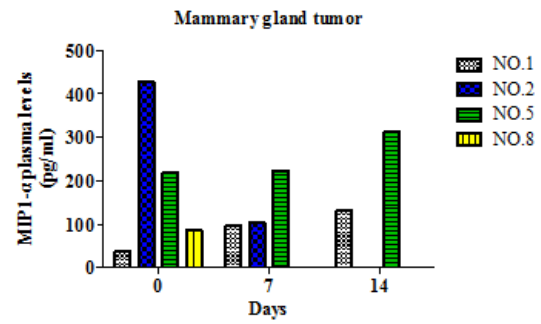

Malignant Mast Cell Tumor

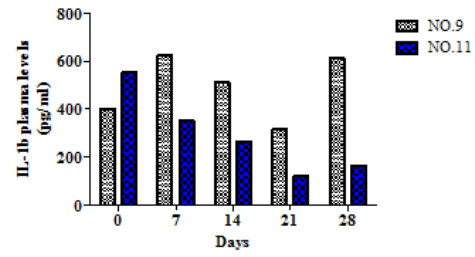

Malignant Mast Cell Tumor

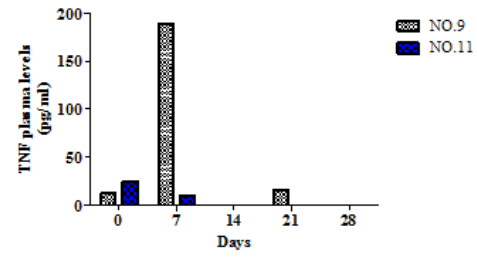

Malignant Mast Cell Tumor

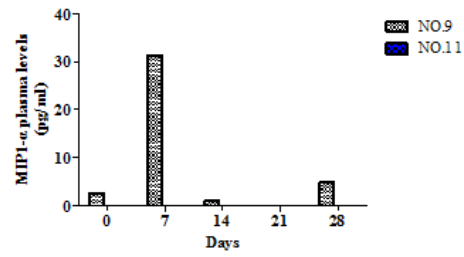

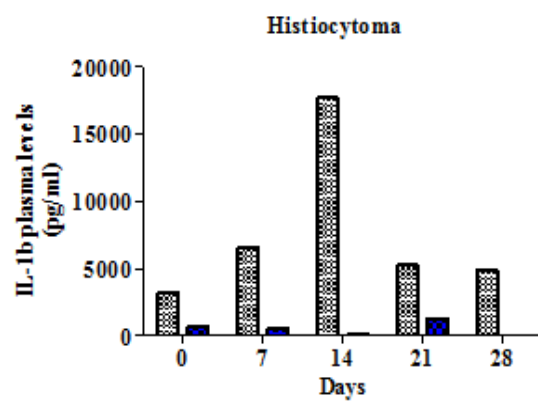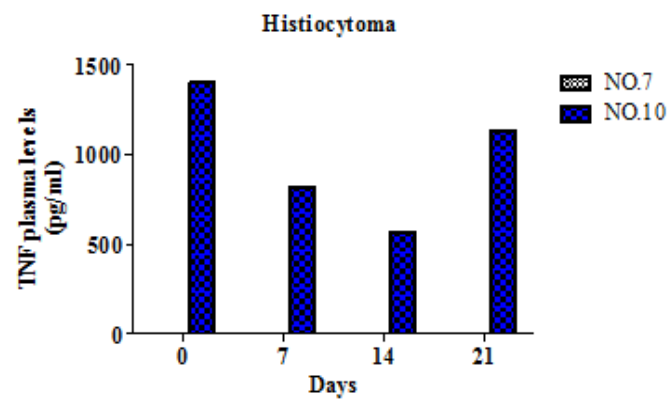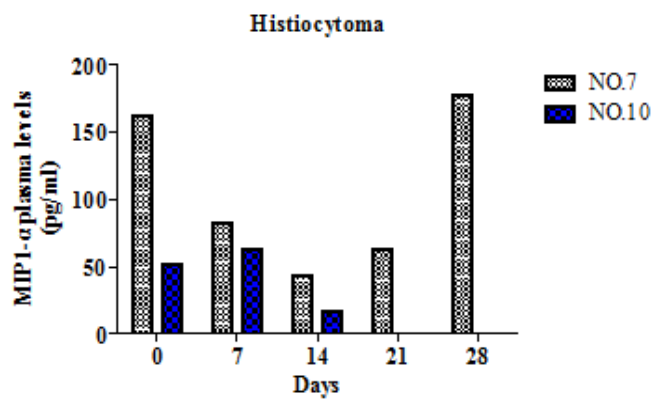

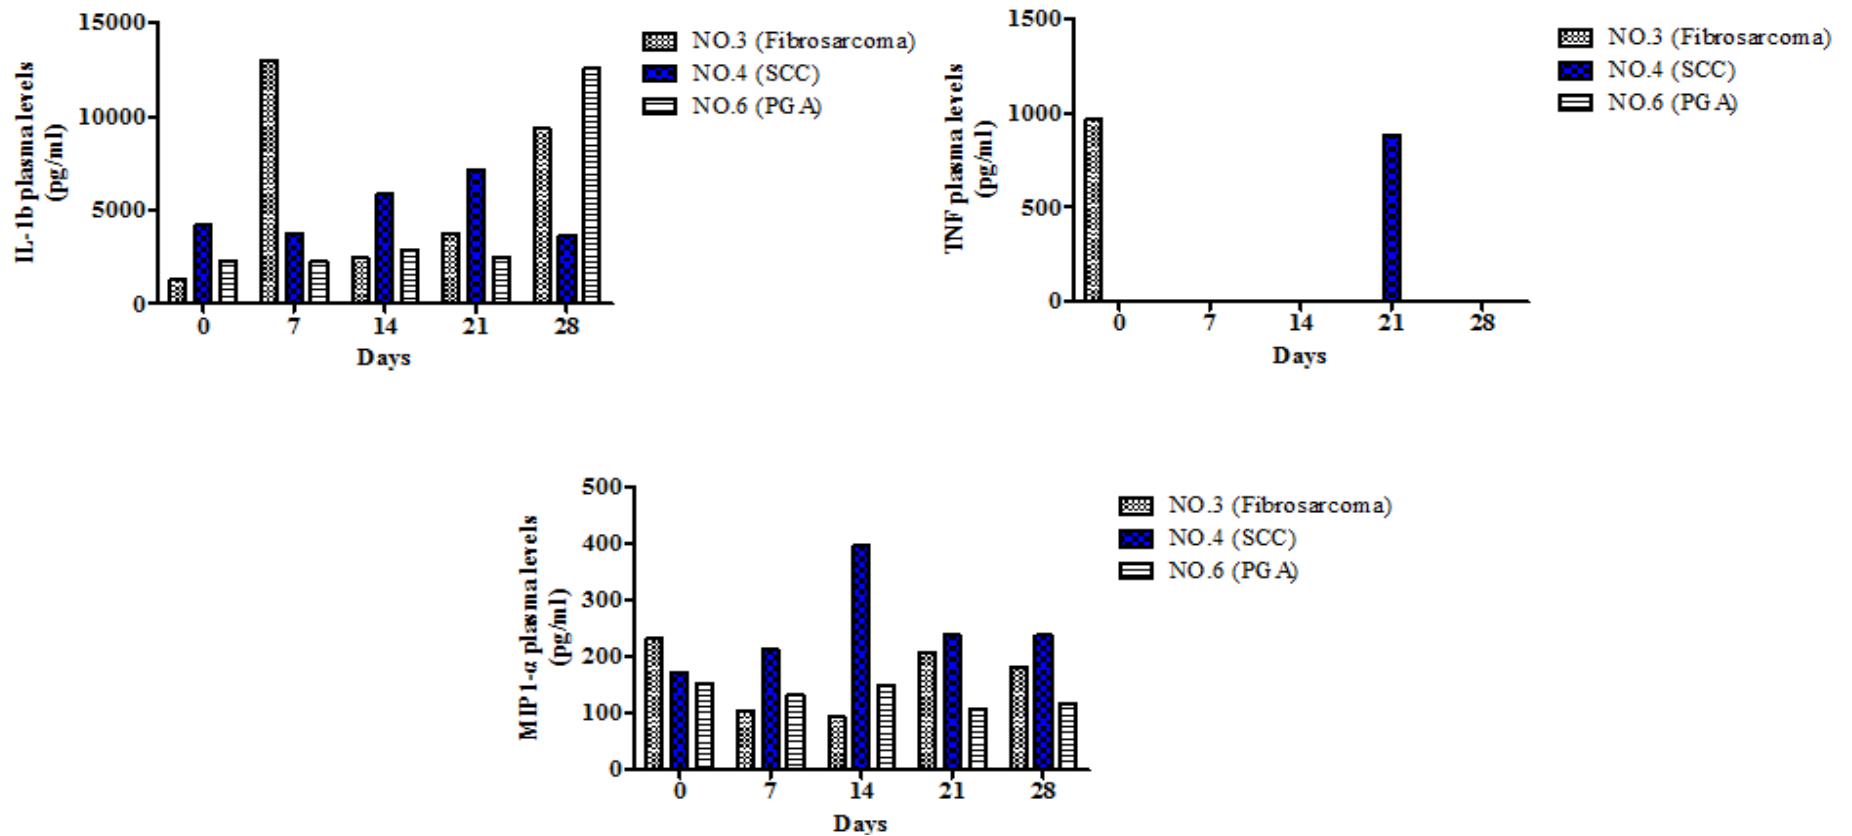

**Supplementary Figure 1:** Changes in serum secretion of macrophage inflammatory protein (MIP)-1, IL-1 $\beta$ , and tumor necrosis factor (TNF)- $\alpha$  at the indicated times after pardaxin treatment (day 0: pre-treatment). Dog numbers refer to the dogs described in Tables 1 and 2.
